# Supplementary material for: Design, development, testing at ISO standards and in vivo feasibility study of a novel polymeric heart valve prosthesis
Source: Royal Society of Chemistry journal article supplement (doi:10.1039/d0bm00412j), 2020-01-01
Supplement: d0bm00412j1.pdf [file d0bm00412j1.pdf]

Supplementary Material

Supplementary Tables

Table S1: Demographic data

|                    |     | Heparin/<br>Uncoated |              |                 |            | History of:      |                           |         |        |                             |     |         | Smoki<br>ng |                                     |           | Medication<br>s:    |                  |              |
|--------------------|-----|----------------------|--------------|-----------------|------------|------------------|---------------------------|---------|--------|-----------------------------|-----|---------|-------------|-------------------------------------|-----------|---------------------|------------------|--------------|
| Patie<br>nt<br>No. | age | Sampl<br>e 1         | Sample<br>2  | sample<br>3     | SEX        | HYPERTENS<br>ION | Hypercholesterola<br>emia | PV<br>D | D<br>M | Cerebrovasc<br>ular disease | CVD | PC<br>I | Curren<br>t | Previo<br>us<br>year<br>stopp<br>ed | Nev<br>er |                     |                  |              |
| EV<br>002          | 60  | low<br>S/Hep         | High/u<br>nc | High/H<br>ep    | Male       | 0                | 0                         | 0       | 0      | 0                           | 0   | 0       |             |                                     | 1         | Clonazepa<br>m      |                  |              |
| EV<br>003          | 56  | Low/H<br>ep          | High/H<br>ep | High/u<br>nc    | Fema<br>le | 0                | 0                         | 0       | 0      | 0                           | 0   | 0       |             | 1989                                |           | Premarin<br>(HRT)   |                  |              |
| EV<br>004          | 51  | Low/<br>unc          | High/H<br>ep | High/u<br>nc    | Fema<br>le | 0                | 0                         | 0       | 0      | 0                           | 0   | 0       |             |                                     | 1         | -                   |                  |              |
| EV<br>005          | 55  | High/<br>Hep         | High/u<br>nc | low/He<br>p     | Fema<br>le | 0                | 0                         | 0       | 0      | 0                           | 0   | 0       |             | 1999                                |           | -                   |                  |              |
| EV<br>006          | 52  | low<br>S/Hep         | High/H<br>ep |                 | Fema<br>le | 0                | 0                         | 0       | 0      | 0                           | 0   | 0       |             |                                     | 1         | -                   |                  |              |
| EV<br>007          | 57  | High/u<br>nc         | Low/<br>unc  |                 | male       | 1                | 0                         | 0       | 0      | 0                           | 0   | 0       |             |                                     | 1         | -                   |                  |              |
| EV<br>008          | 52  | low<br>S/Hep         | High/H<br>ep |                 | Fema<br>le | 0                | 0                         | 0       | 0      | 0                           | 0   | 0       |             |                                     | 1         | oxytetracyc<br>line | Vitamin D        |              |
| EV<br>009          | 64  | Low/<br>unc          | High/u<br>nc |                 | Fema<br>le | 0                | 0                         | 0       | 0      | 0                           | 0   | 0       |             |                                     | 1         |                     |                  |              |
| EV<br>010          | 52  | low/<br>Hep          | High/H<br>ep | <--New<br>Batch | male       | 0                | 0                         | 0       | 0      | 0                           | 0   | 0       |             |                                     | 1         | Citalopram          | Lansopraz<br>ole |              |
| EV<br>011          | 64  | low/<br>Hep          | High/H<br>ep | <--New<br>Batch | Fema<br>le | 1                | 0                         | 0       | 0      | 0                           | 0   | 0       |             |                                     | 1         | Amlodipine          | Lansopraz<br>ole | Narpox<br>en |

**Table S2:** Hydrodynamic measurements and durability of non-sterilised valves and valves sterilised in ethylene oxide.

|                   | Hydrodynamics |                        |             | Durability (*10 <sup>-6</sup> ) |             |
|-------------------|---------------|------------------------|-------------|---------------------------------|-------------|
|                   |               | EOA (cm <sup>2</sup> ) | REG (%)     |                                 |             |
| Non-sterilised    | n=6           | 1.65 ± 0.13            | 4.30 ± 0.82 | n=3                             | 37.5 ± 13.9 |
| Sterilised in EtO | n=1           | 1.64 ± 0.05            | 2.72 ± 0.21 | n=1                             | 33          |

## Supplementary Video Legends

### Video 1: - Polymeric valve in accelerated fatigue tester

Accelerated fatigue tester at 30 Hz with water at 37°C as the working fluid, under test conditions specified by ISO 5840:2015.

### Video 2: - Polymeric valve subjected to hydrodynamic performance in a heart pulse duplicator

The test conditions conformed to ISO 5840:2015 requirements i.e. frequency of 70 bpm, simulated cardiac output 5 l/min, systolic duration 35% at normotensive conditions

### Video 3: Elastic/dynamic properties of the polymeric valve

These properties were uniquely engineered to achieve an artificial valve able to follow the physiologic systo-diastolic dynamics of the native valvular annulus after implant.

### Video 4: Echocardiography of polymeric valve in-vivo

Showing no peri-valvular jets of regurgitation.

### Video 5: Echocardiography of polymeric valve in-vivo

Showing no trans-valvular jet of regurgitation.
